# Supplementary material for: On-surface synthesis and characterization of anti-aromatic cyclo[20]carbon
Source: Research Square preprint supplement (doi:10.21203/rs.3.rs-3411934/v1), 2023-10-05
Supplement: Supplementary file 1 [file 731734e32ee1836ec4a23a20.docx]

**Extended Data**

**On-surface synthesis and characterization of anti-aromatic cyclo[20]carbon**

Luye Sun§, Wei Zheng§, Faming Kang, Wei Xu*

Interdisciplinary Materials Research Center, School of Materials Science and Engineering, Tongji University, Shanghai 201804, People’s Republic of China.

*Corresponding author. Email: xuwei@tongji.edu.cn

§equalcontribution

**Table of Contents**

Figs. 1 to 10


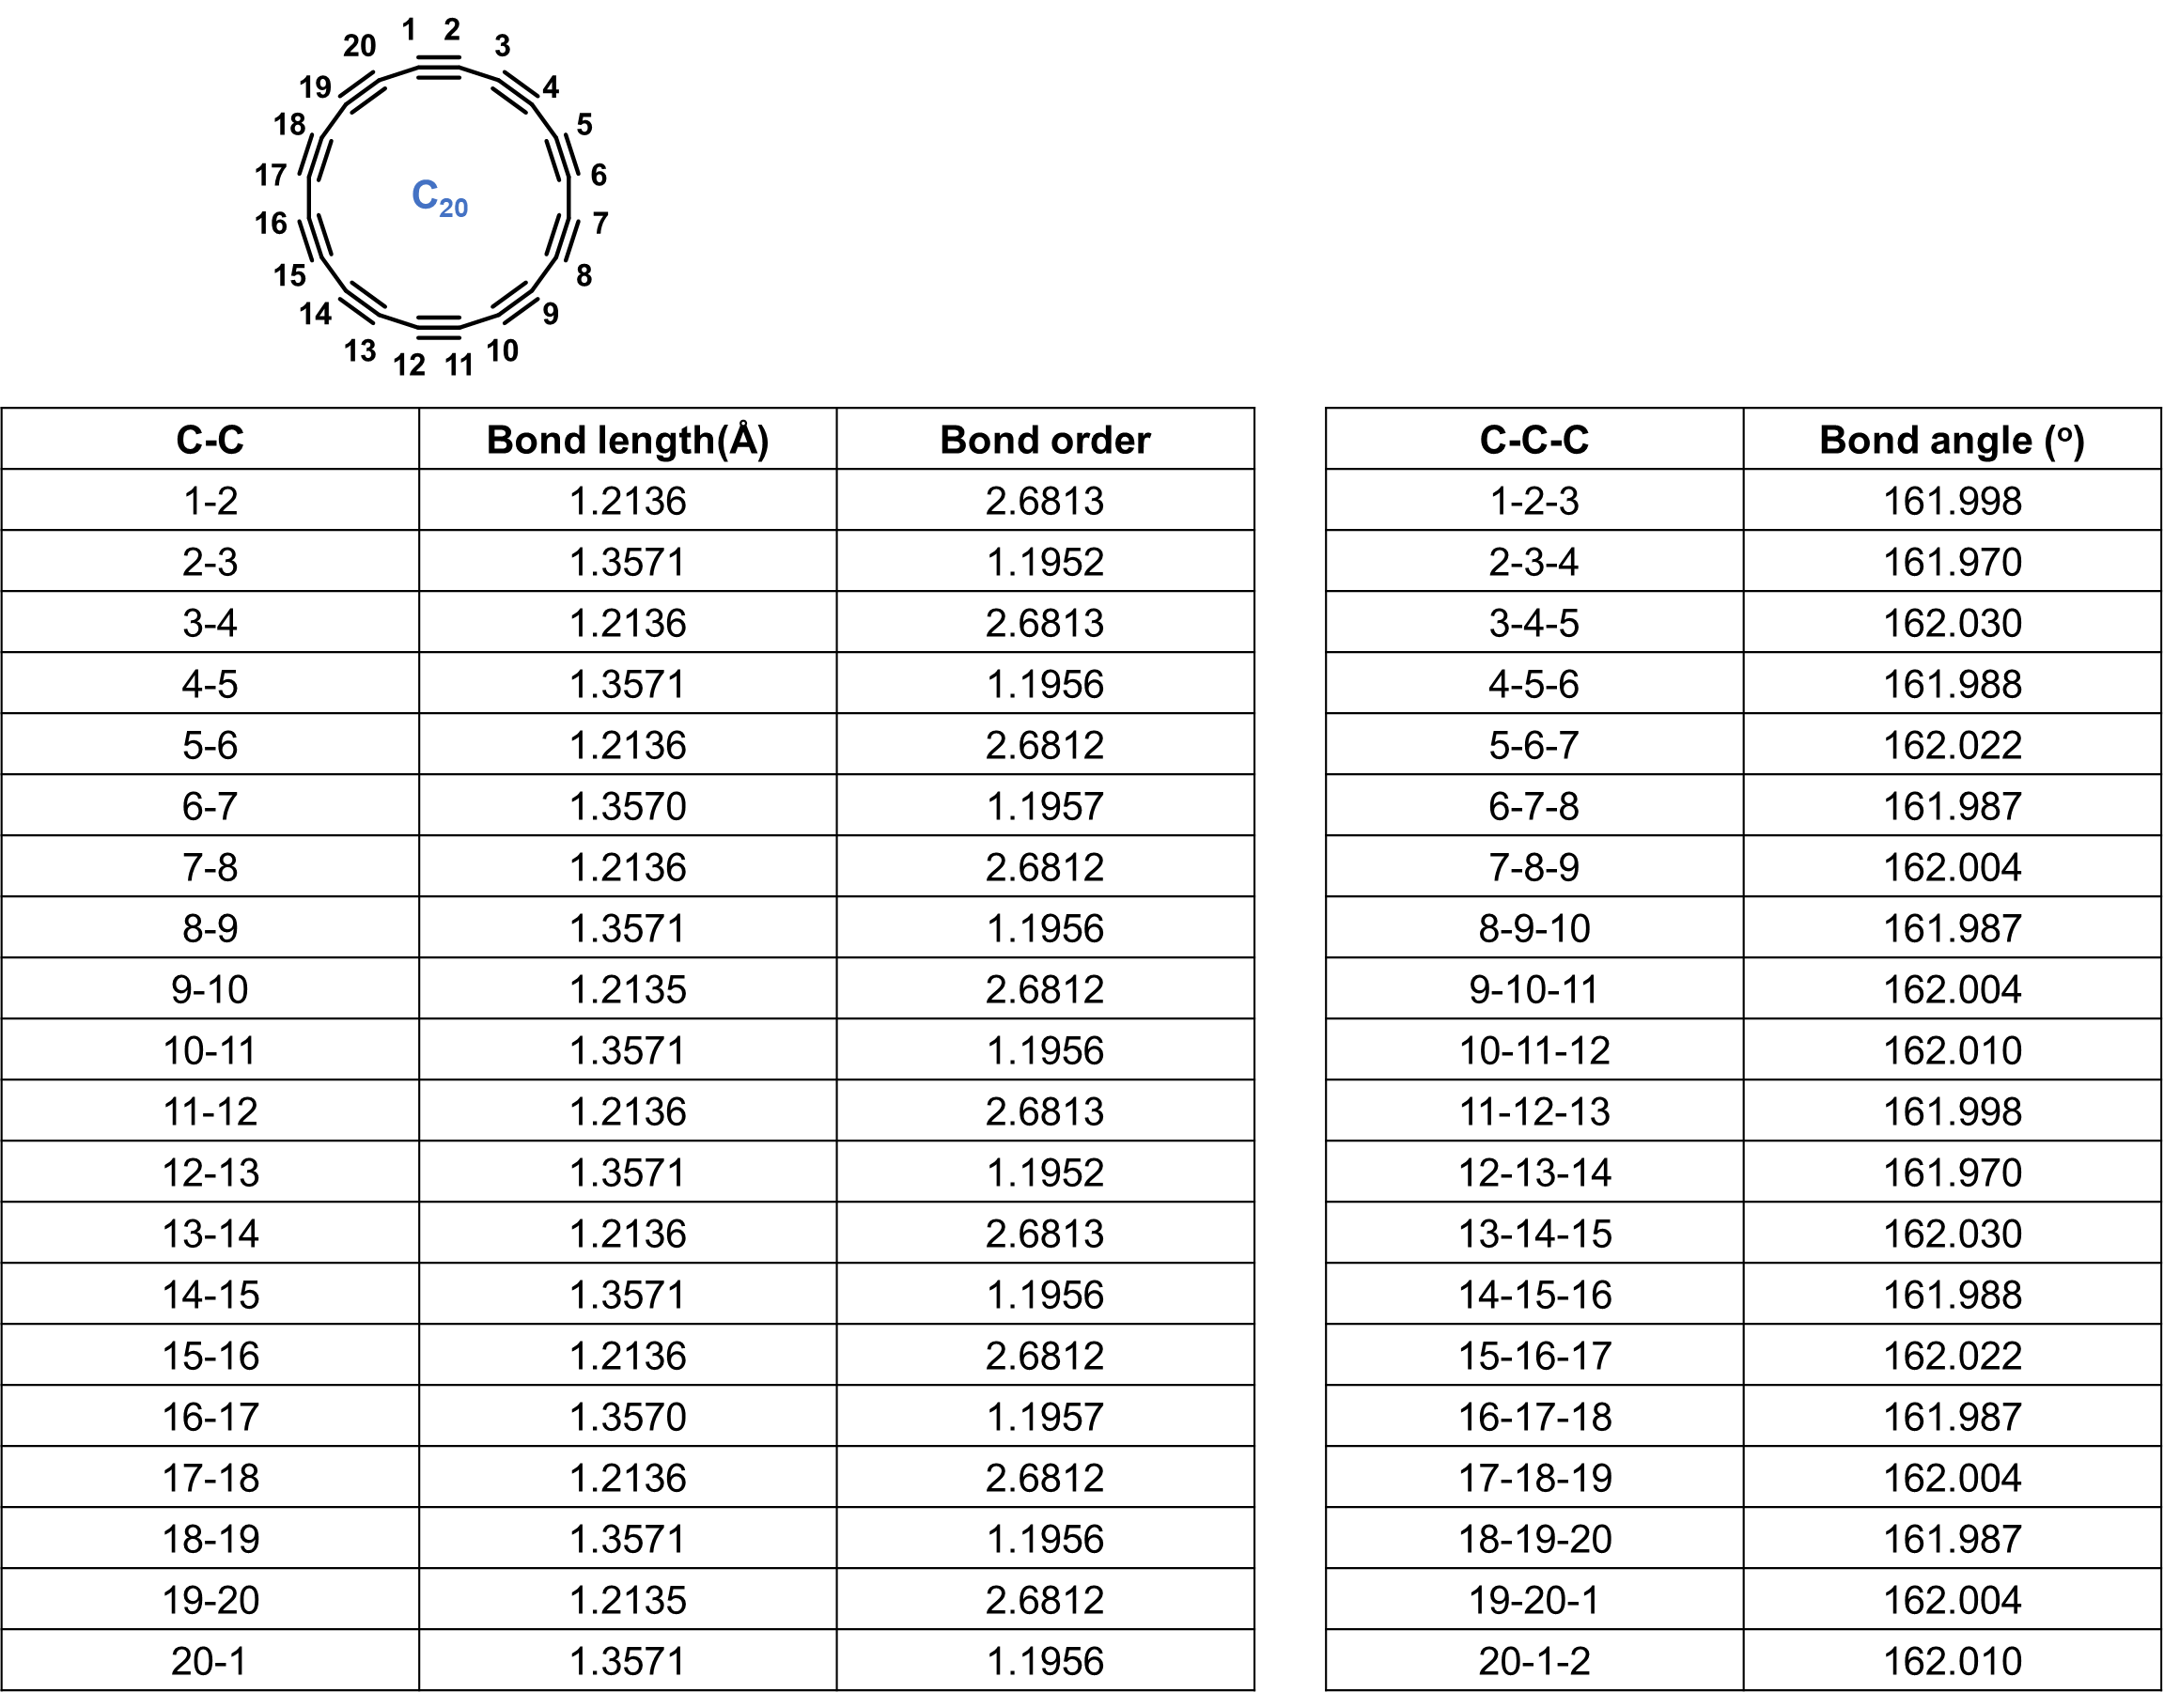


**Fig. 1. The bond lengths, Mayer bond orders, and bond angles in a cyclo[20]carbon.** Calculations were conducted at the ωB97XD/def2-TZVP level, revealing a polyynic structure of C20 (**BLA = 0.14 Å**).


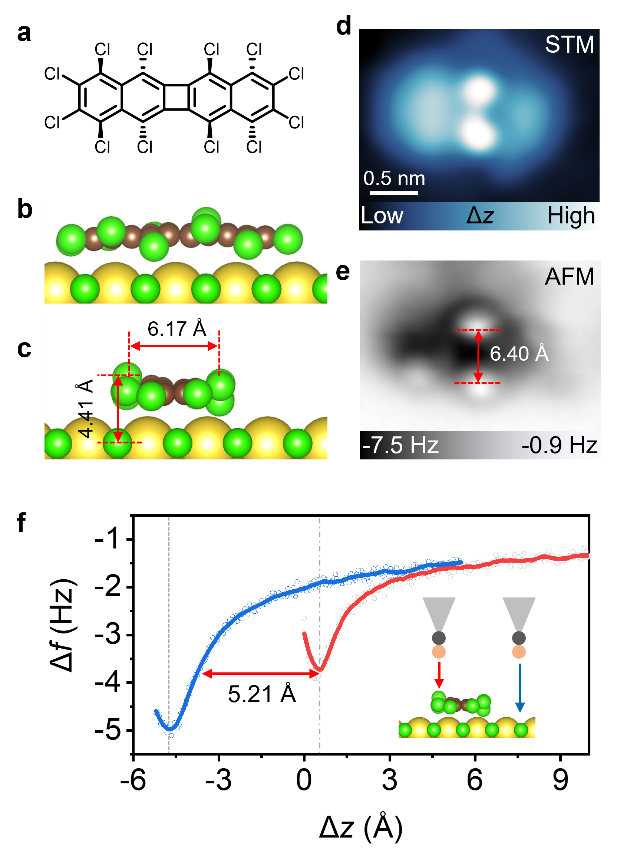


**Fig. 2. Characterization of the C20Cl12 precursor.** (**a**) Chemical structure. (**b, c**) Side view of calculated structure of C20Cl12 molecule on the NaCl surface. (**d, e**) STM and AFM images of C20Cl12. (**f**) Spectra of frequency shift (Δ*f*) as a function of tip height (Δ*z*). The red and blue spectra were taken at the topmost Cl atom of the C20Cl12 molecule, and the Cl atom at the first layer of NaCl surface, respectively. Inset: schematics of the CO-tip approaching processes. Scanning condition: *I* = 5 pA, *V* = 0.3 V.

**
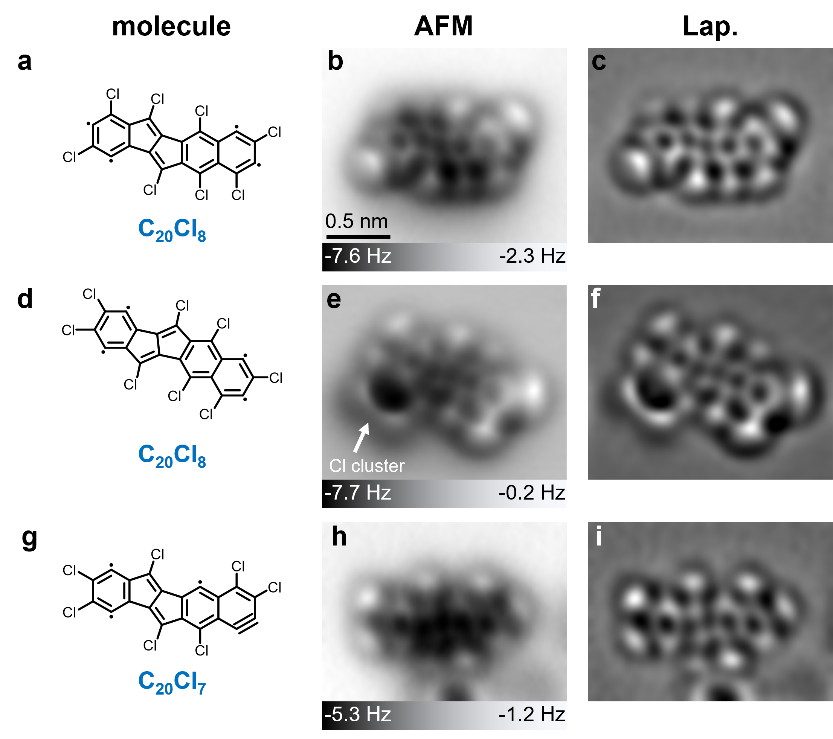
**

**Fig. 3. Other observed intermediates formed after manipulation of C20Cl12.** (**a-c**) C20Cl8, (**d-f**) C20Cl8, (**g-i**) C20Cl7. The scale bar in (**b**) applies to all images.


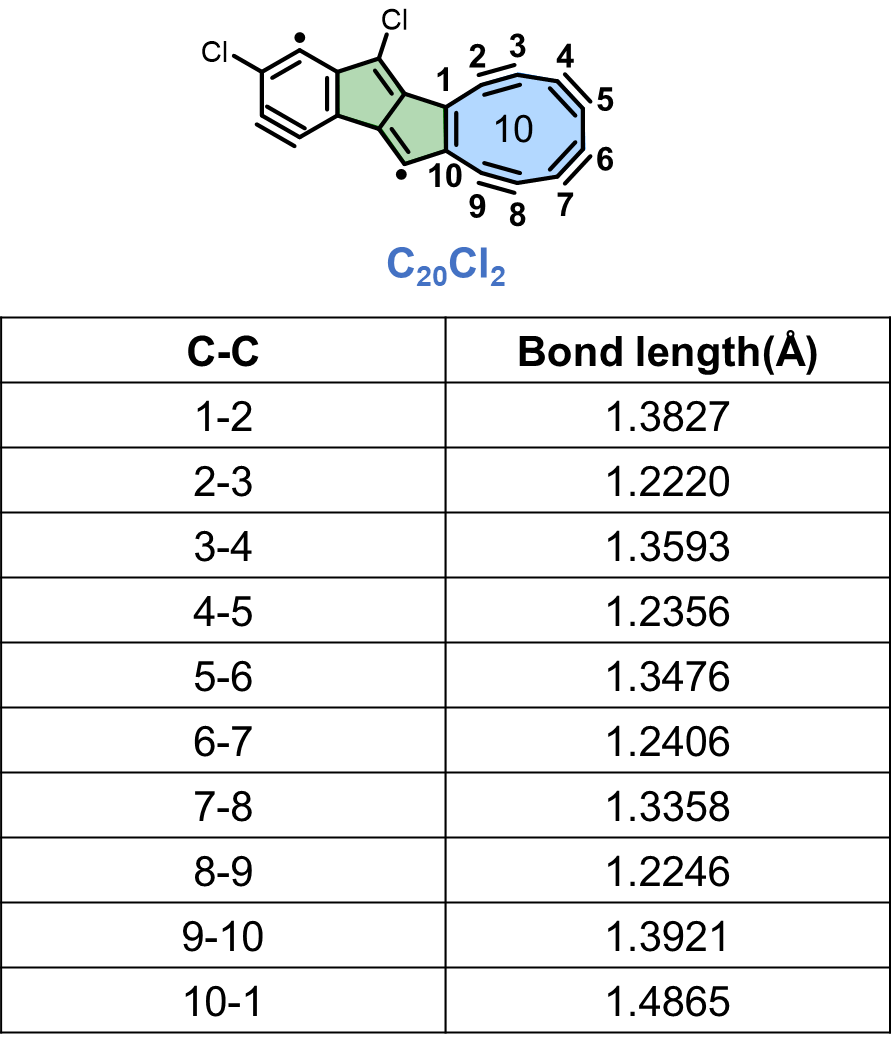


**Fig. 4. The bond lengths of a 10-membered ring of a C20Cl2 intermediate.** Calculations were conducted at the ωB97XD/def2-TZVP level.

**
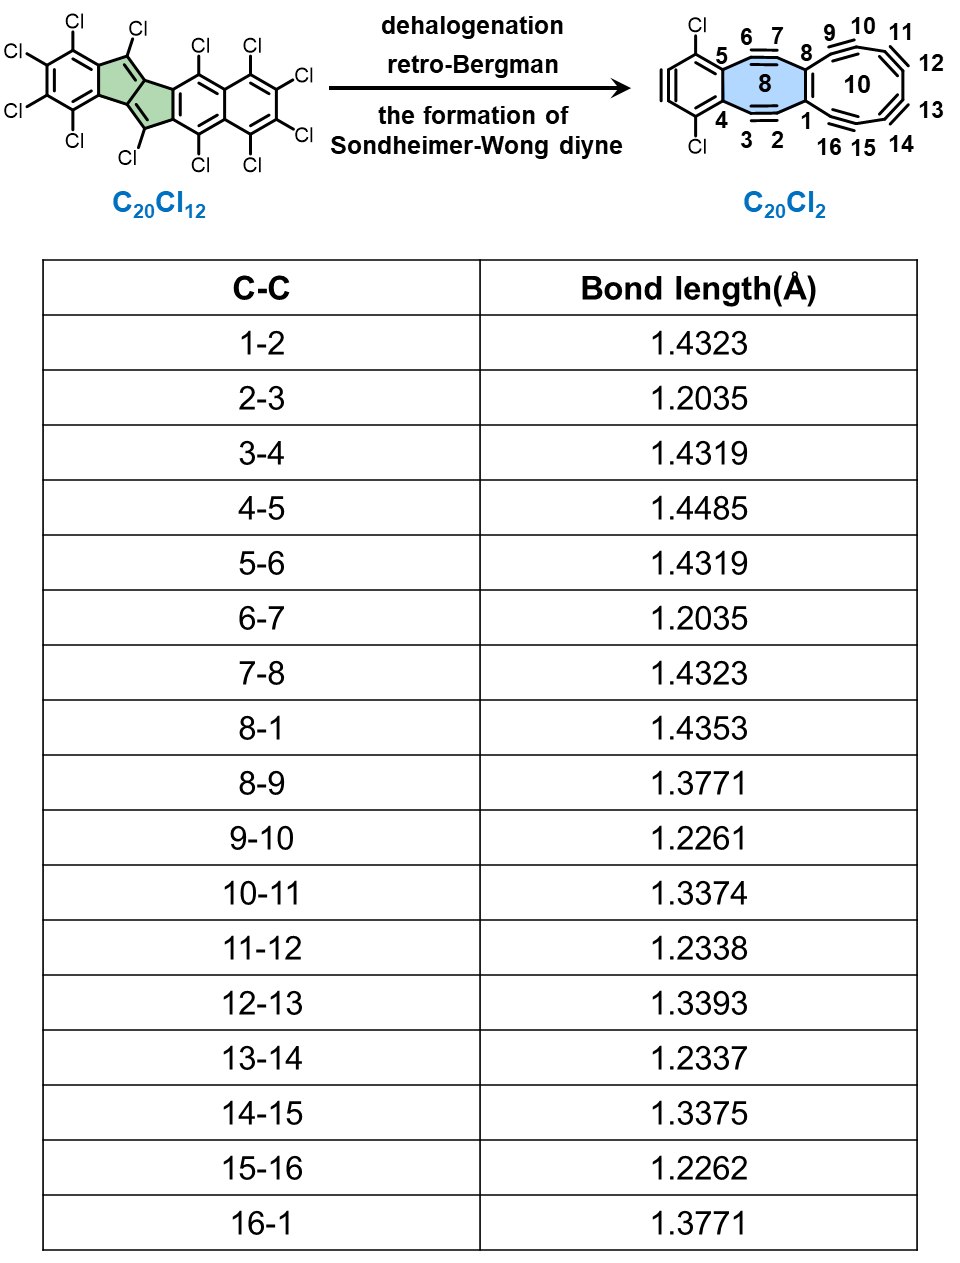
**

**Fig. 5. Reaction scheme and bond lengths calculations.** Formation of an 8-membered ring from a 5-5 ring configuration via Sondheimer-Wong diyne reaction. Bond lengths of an 8-membered and a 10-membered ring of a C20Cl2 intermediate. Calculations were conducted at the ωB97XD/def2-TZVP level.

**
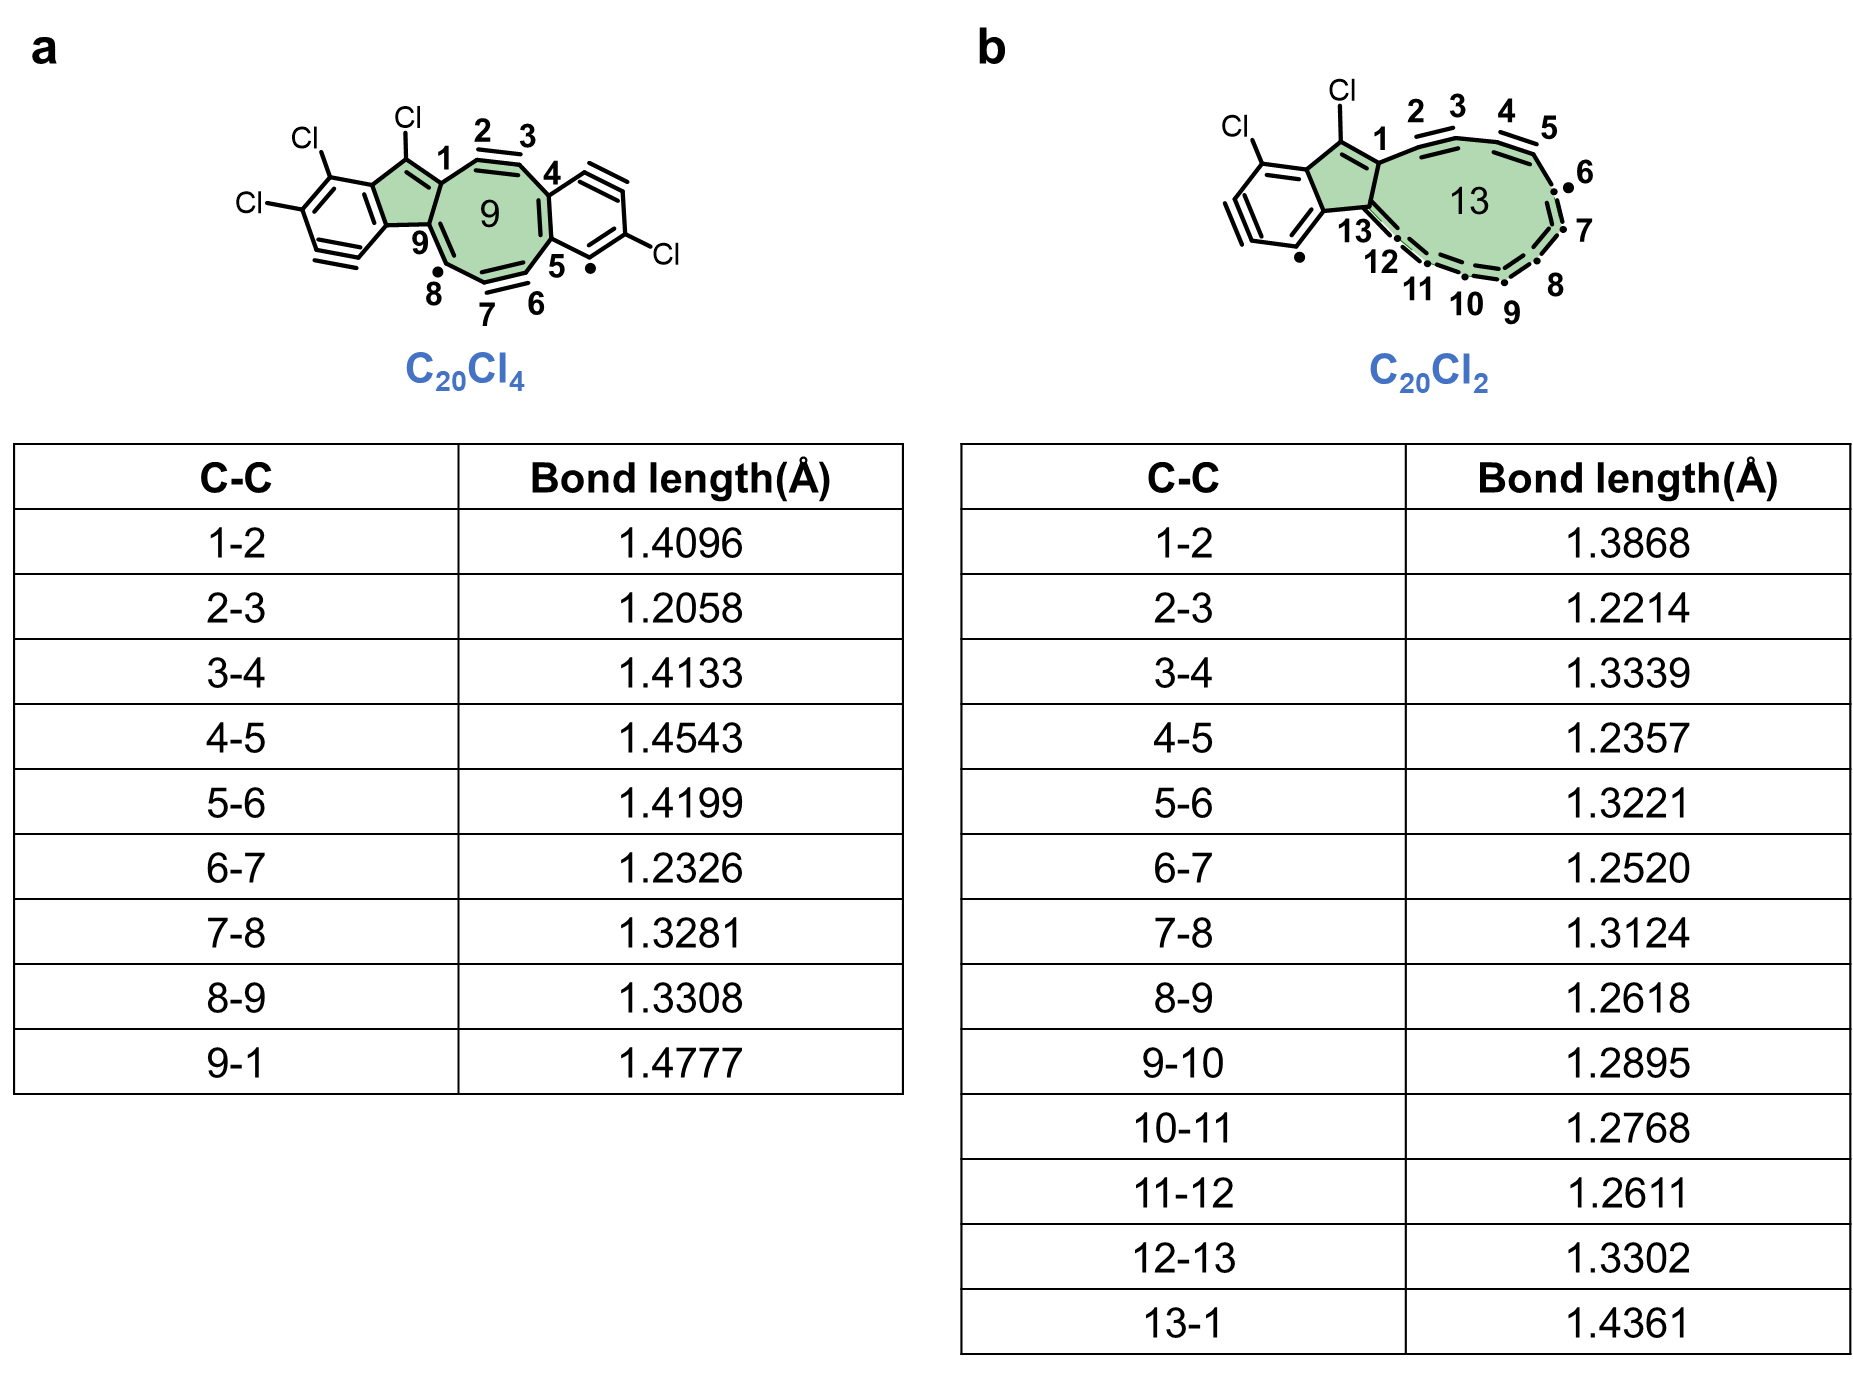
**

**Fig. 6. The bond lengths calculations.** The bond lengths of a 9-membered ring of a C20Cl4 intermediate (**a**) and a 13-memebered ring of a C20Cl2 intermediate (**b**). Calculations were conducted at the ωB97XD/def2-TZVP level.


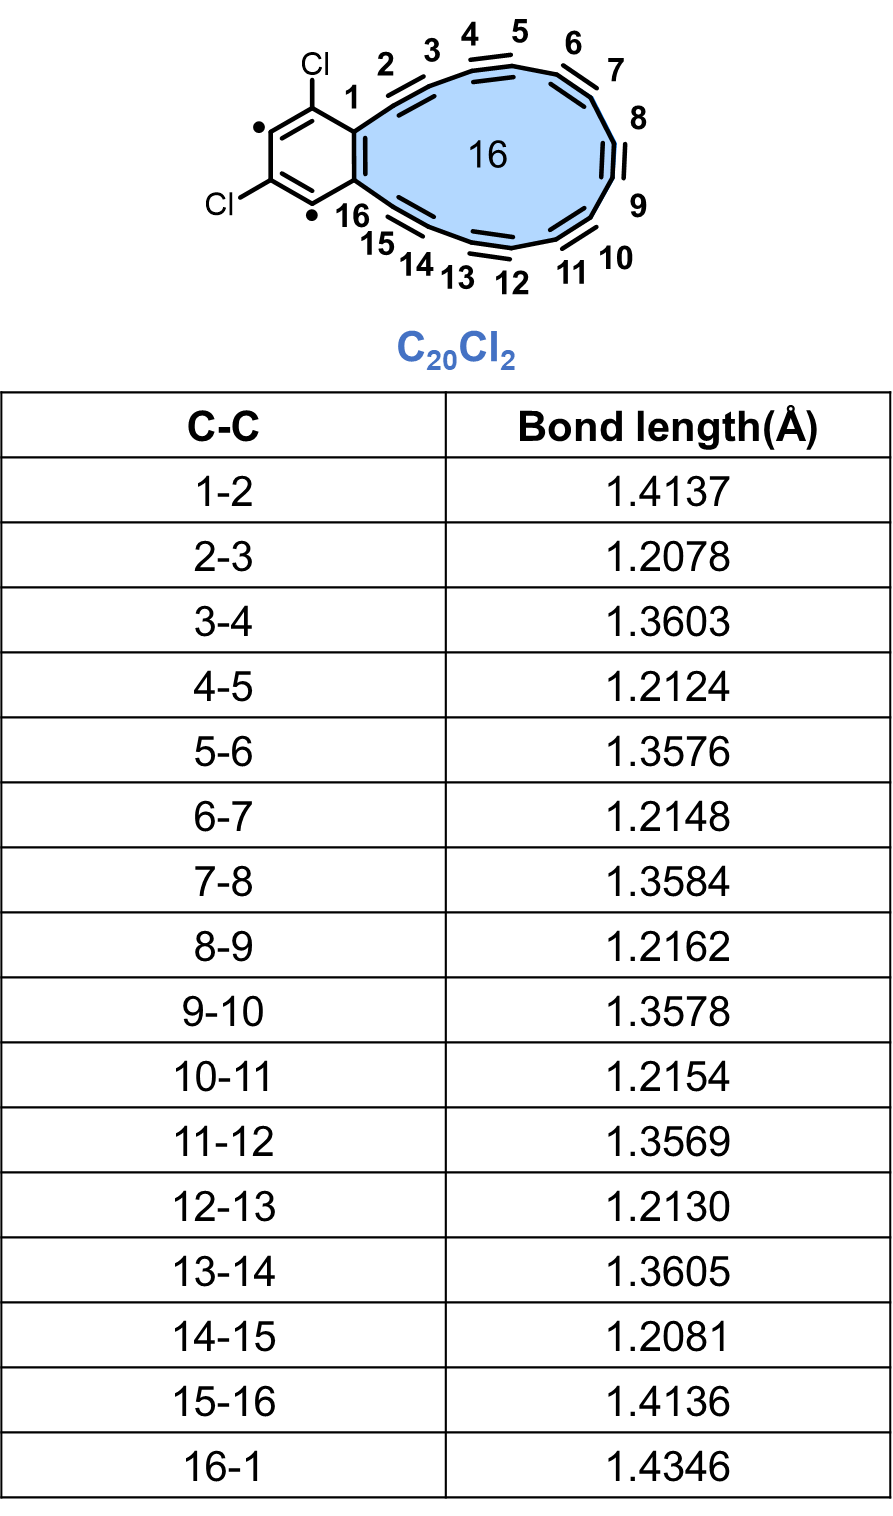


**Fig. 7. The bond lengths of a 16-membered ring of a C20Cl2 intermediate.** Calculations were conducted at the ωB97XD/def2-TZVP level.


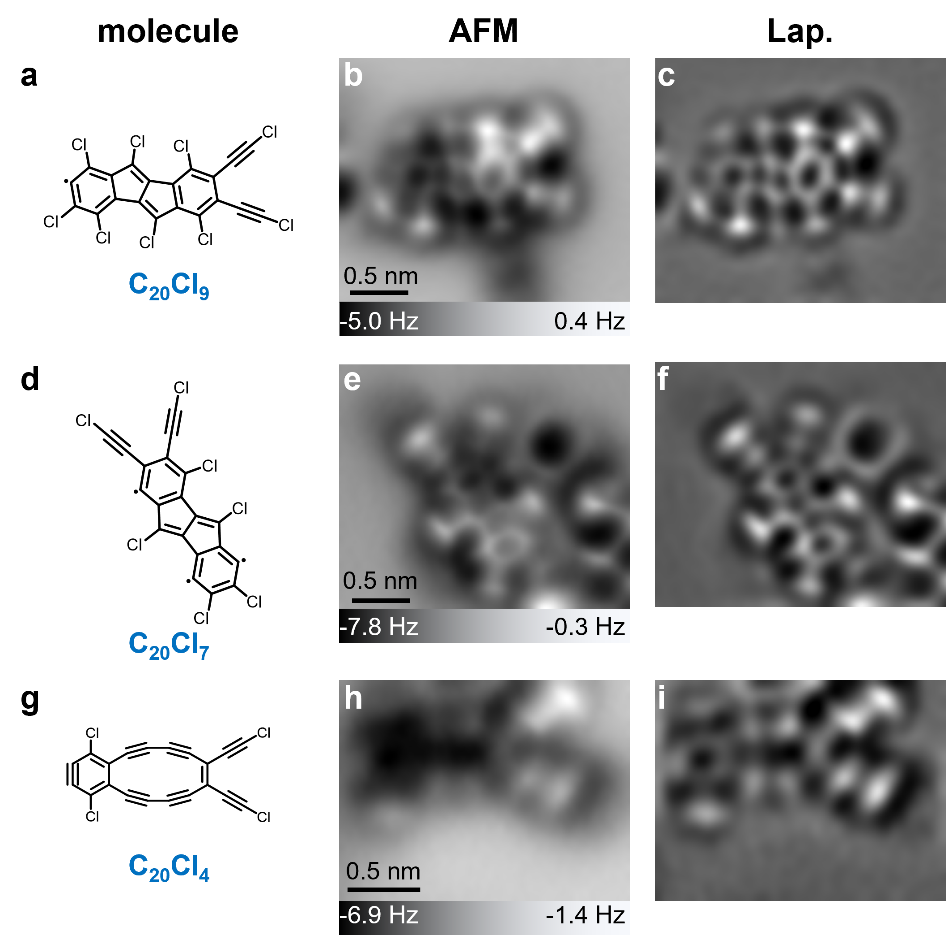


**Fig. 8. Other observed intermediates.** (**a-c**) C20Cl9, (**d-f**) C20Cl7, (**g-i**) C20Cl4.

**
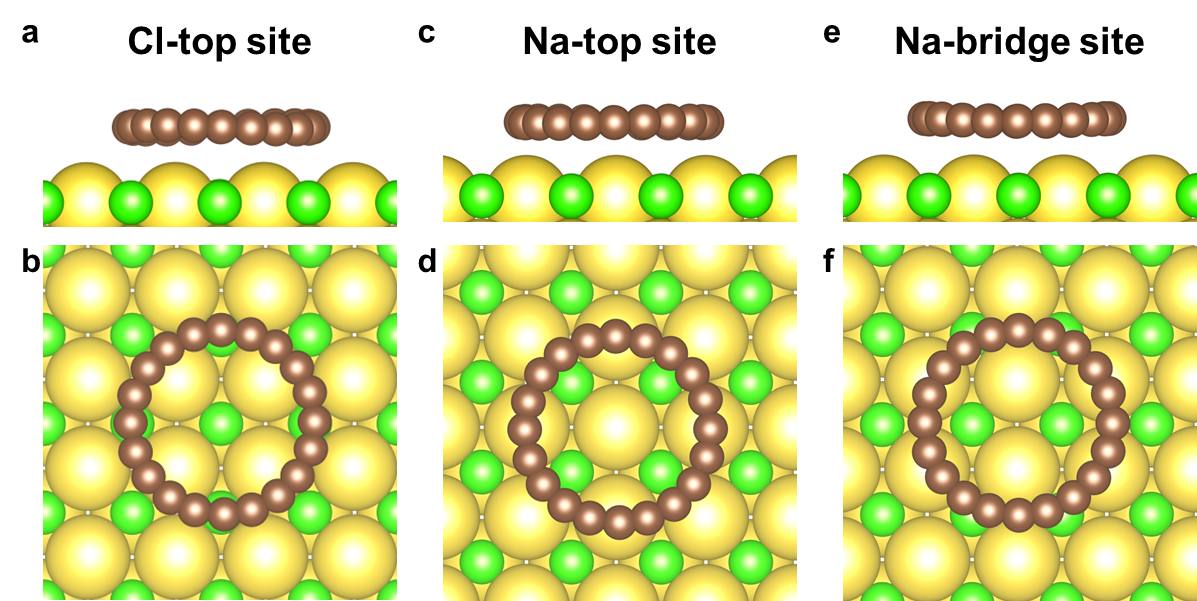
**

**Fig. 9. DFT calculated C20 structures.** Adsorbed on Cl-top site (**a, b**), Na-top site (**c, d**) and Na-bridge site (**e, f**), respectively.


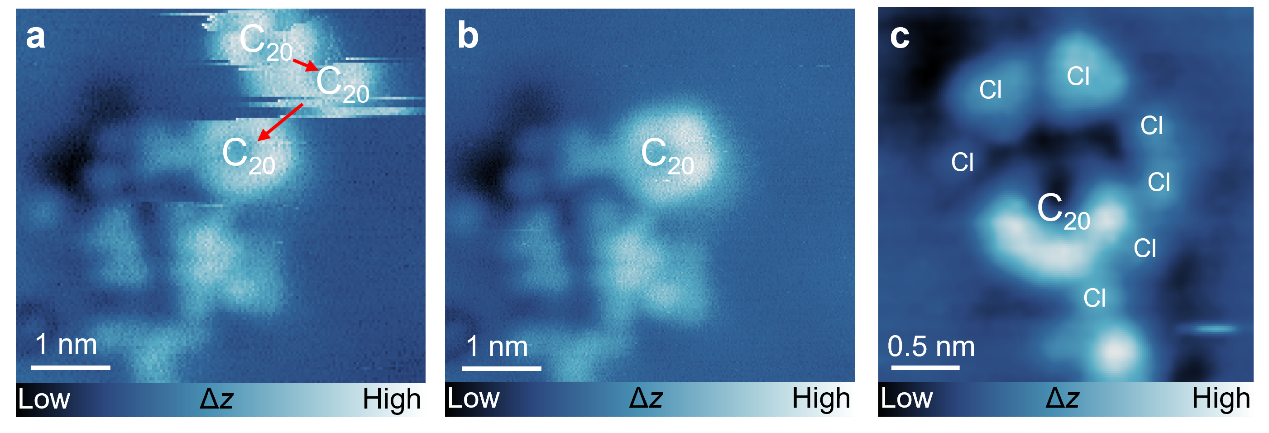


**Fig. 10. Tip manipulation of a C20 on the NaCl surface.** Individual C20 exhibits high mobility on the NaCl surface, and could be easily disturbed by the tip. While, the Cl clusters could help to stabilize the C20 molecule. (**a**) Moving pathway of a C20. (**b**) Final location of a C20 blocked by Cl atoms. (**c**) A more subtle manipulation of a C20 to be trapped into an “atomic fence” formed by Cl atoms. Scanning condition: *I* = 4 pA, *V* = 0.3 V.
